# Supplementary material
Source: publisher figshare collection journal article supplement (https://acs.figshare.com/ndownloader/files/14381477)
Supplement: Supplementary file 1 [file 14381477]

Supporting Information

**Porous High Valence Metal-Organic Framework  
Featuring Open Coordination Sites for Effective Water  
Adsorption**

Yang-Hui Luo, \* Xiao-Tong He, Dan-Li Hong, Cong Wang, Jia-Ying Wang,

Fang-Hui Chen, Chen Chen and Bai-Wang Sun<sup>1, \*</sup>

School of Chemistry and Chemical Engineering, Southeast University,

Nanjing, 211189, P.R. China. E-mail: [peluoyh@sina.com](mailto:peluoyh@sina.com) (LYH);

[chmsunbw@seu.edu.cn](mailto:chmsunbw@seu.edu.cn) (SBW).

**Table S1** Crystal data and structure refinement details for **HV-MOF-1**.

| Compound                              | <b>HV-MOF-1</b>                                                  |
|---------------------------------------|------------------------------------------------------------------|
| Formula                               | C <sub>21</sub> H <sub>23</sub> ErN <sub>4</sub> O <sub>11</sub> |
| Formula weight                        | 674.69                                                           |
| Crystal system                        | Triclinic                                                        |
| Space group                           | <i>P</i> -1                                                      |
| <i>a</i> / Å                          | 9.862(2)                                                         |
| <i>b</i> / Å                          | 11.693(2)                                                        |
| <i>c</i> / Å                          | 13.404(3)                                                        |
| $\alpha$ /°                           | 66.91(3)                                                         |
| $\beta$ /°                            | 86.98(3)                                                         |
| $\gamma$ /°                           | 76.69(3)                                                         |
| T/K                                   | 293 (2)                                                          |
| $\mu$ (mm <sup>-1</sup> )             | 0.095                                                            |
| Cryst dimensions                      | 0.21×0.10×0.10                                                   |
| No. of reflns collected               | 5055                                                             |
| No. of unique reflns                  | 3747                                                             |
| No. of params                         | 320                                                              |
| Goodness-of-fit on $F^2$              | 0.969                                                            |
| $R_1$ , $wR_2$ ( $ I  > 2\sigma(I)$ ) | 0.0624, 0.1334                                                   |
| $R_1$ , $wR_2$ (all data)             | 0.0953, 0.1467                                                   |
| CCDC No                               | 1864545                                                          |

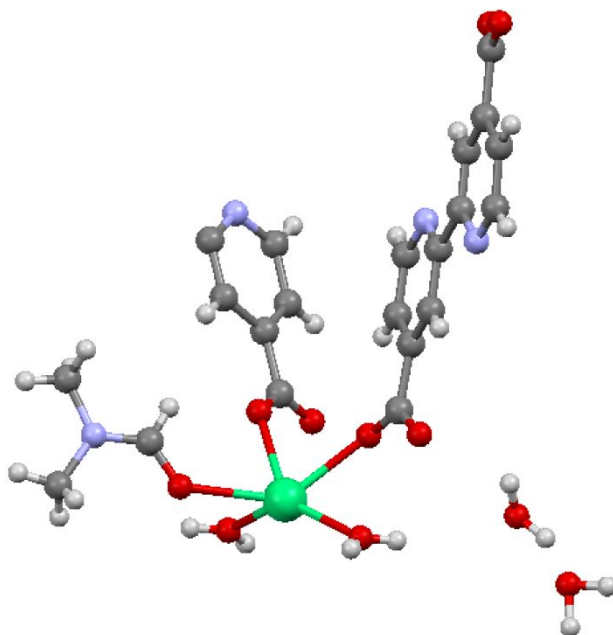

**Figure S1.** The asymmetric unit of **HV-MOF-1**.

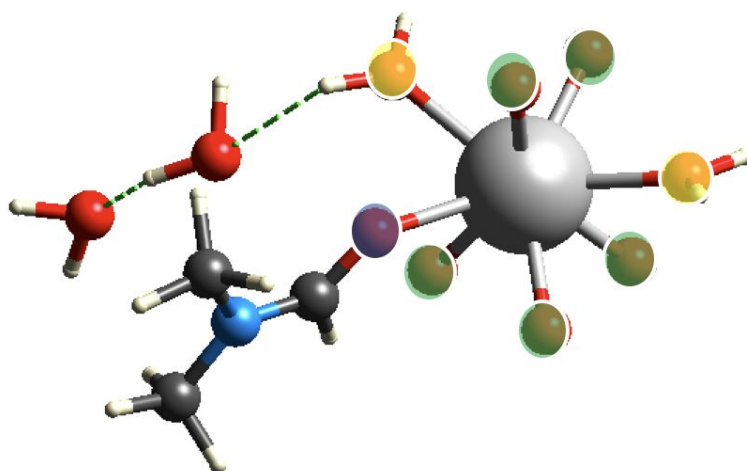

**Figure S2.** The stretch direction of the two lattice H<sub>2</sub>O (in yellow shadow), DMF (in blue shadow) and dcbp molecules (in green shadow) around the Er<sup>3+</sup> anions.

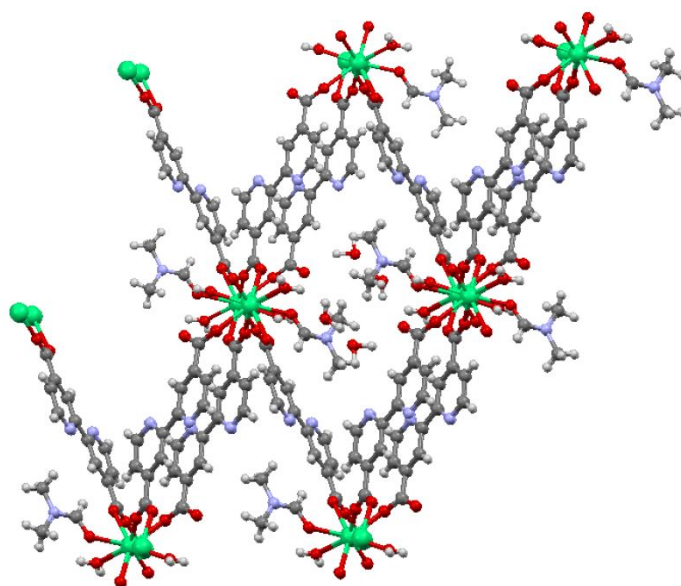

**Figure S3.** Illustration of the stretch direction for all of the solvent molecules both coordinated and un-coordinated around the diamond-like pores.

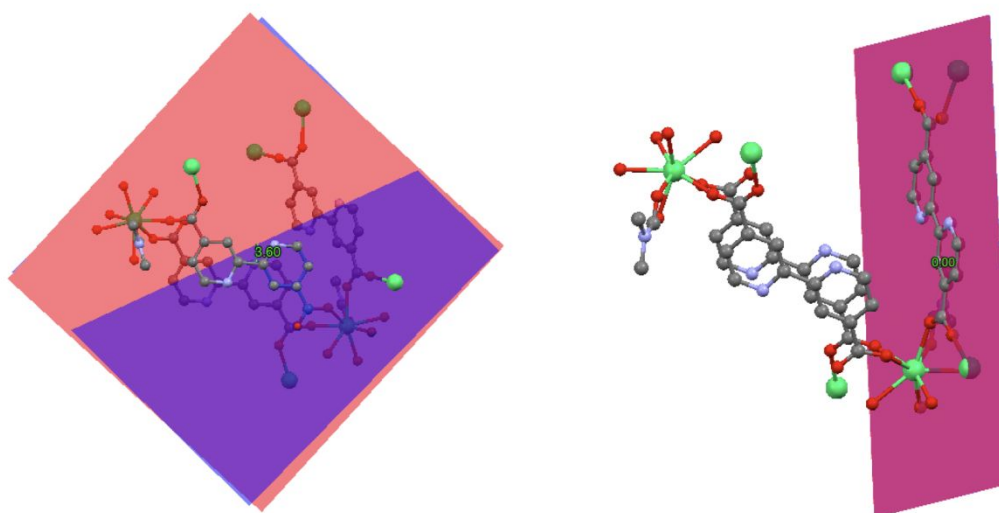

**Figure S4.** The co-planar of pyridine rings for three-dentate (left) and four-dentate motif (right), with dihedral angle of  $3.6^\circ$  and  $0^\circ$ , respectively.

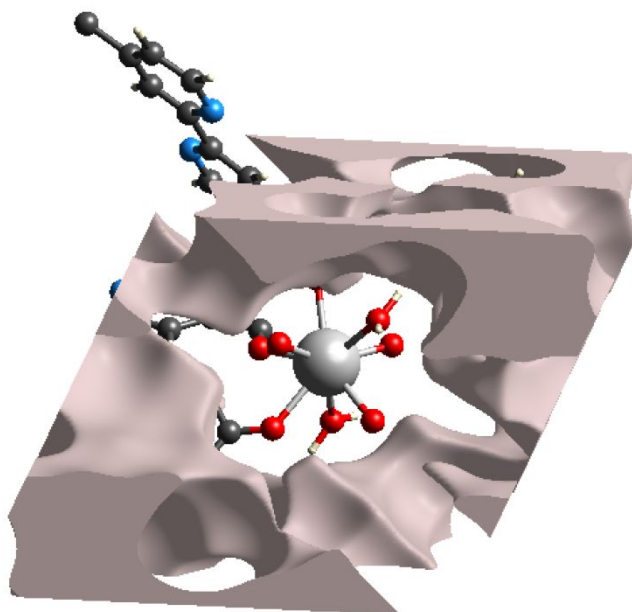

**Figure S5.** Crystal voids calculations of **HV-MOF-1**.

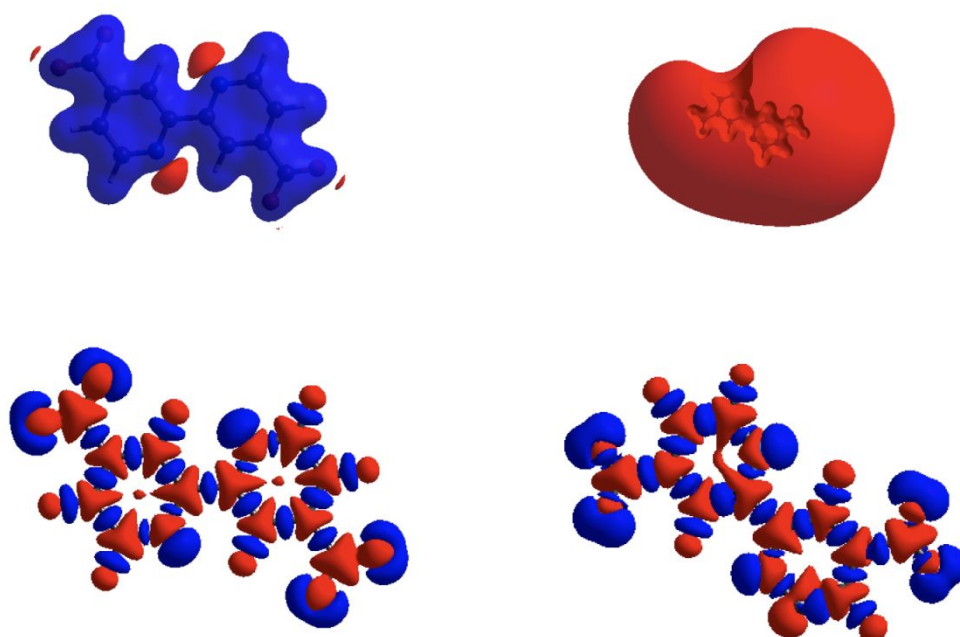

**Figure S6.** Comparison between the Electrostatic potentials (upper) and Promolecule density of dcbp molecules in different bridging motifs.

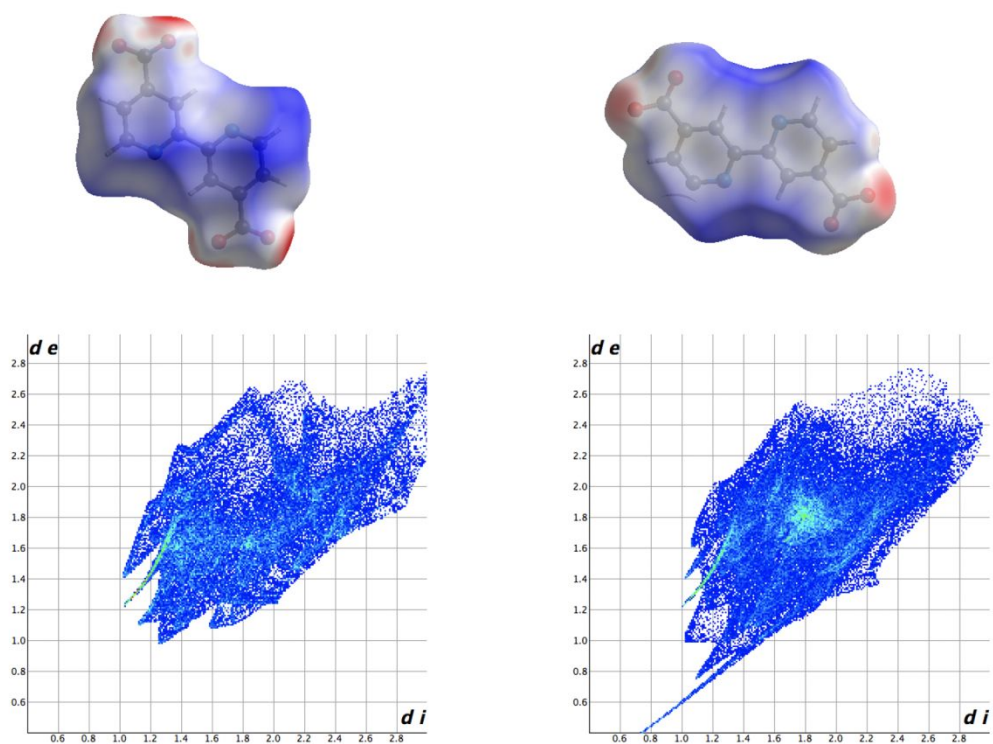

**Figure S7.** Comparison between the 3-D  $d_{\text{norm}}$  Hirshfeld surfaces and 2-D fingerprint plots for dcbp molecules in different bridging motifs.

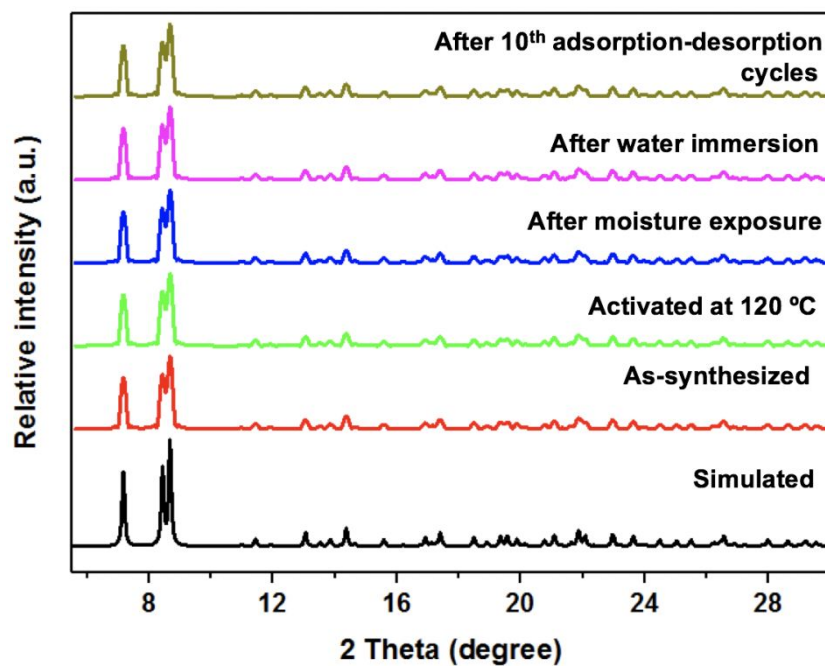

**Figure S8.** PXRD patterns of **HV-MOF-1** in different adsorption-desorption states.

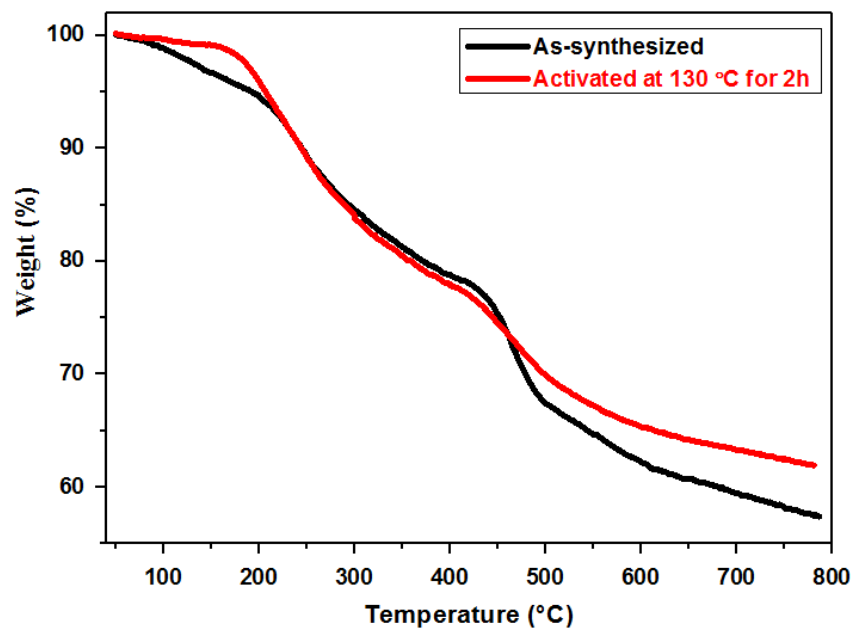

**Figure S9.** Comparison between the TGA profiles of **HV-MOF-1** in different water adsorption-desorption states

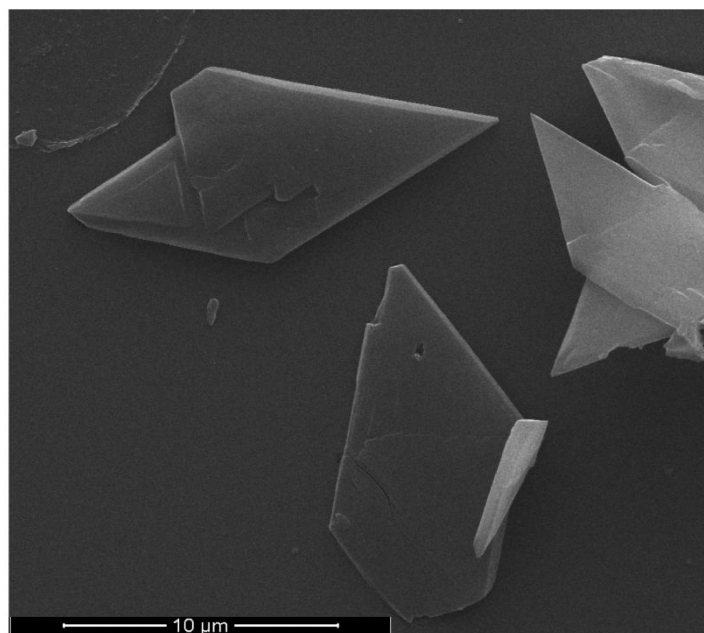

**Figure S10.** SEM image of the activated **HV-MOF-1** species.

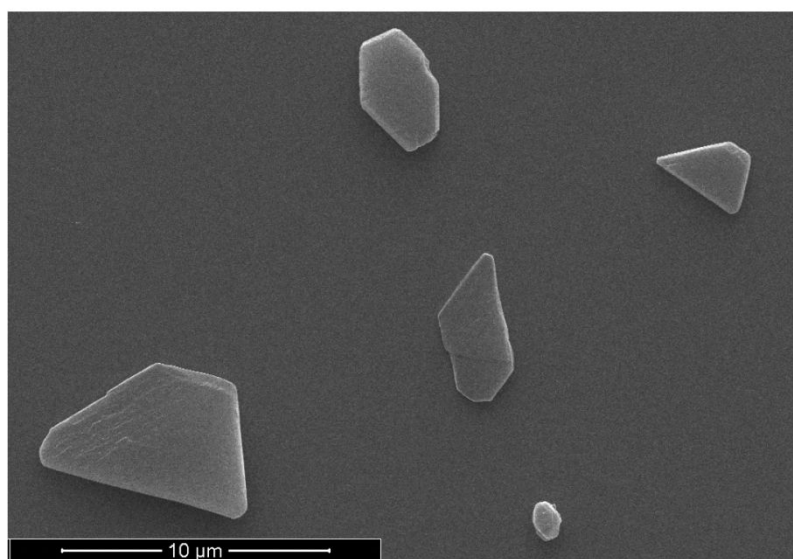

**Figure S11.** SEM image of the activated **HV-MOF-1** species after immersion in water for more than 24h.
